# Supplementary material for: Impact of freeze-thaw cycles on soil structure and soil hydraulicproperties
Source: Copernicus journal article supplement (doi:10.5194/soil-2021-13), 2021-02-22
Supplement: Supplementary file 1 [file soil-2021-13-supplement.pdf]

# Impact of freeze-thaw cycles on soil structure and soil hydraulic properties – Supplementary Information

Frederic Leuther<sup>1</sup>, Steffen Schlüter<sup>1</sup>

<sup>1</sup>Department of Soil System Science, Helmholtz Centre for Environmental Research – UFZ GmbH, Halle, 06120, Germany

## 5 S1 and S2: Soil temperature profiles from both study sites in Germany

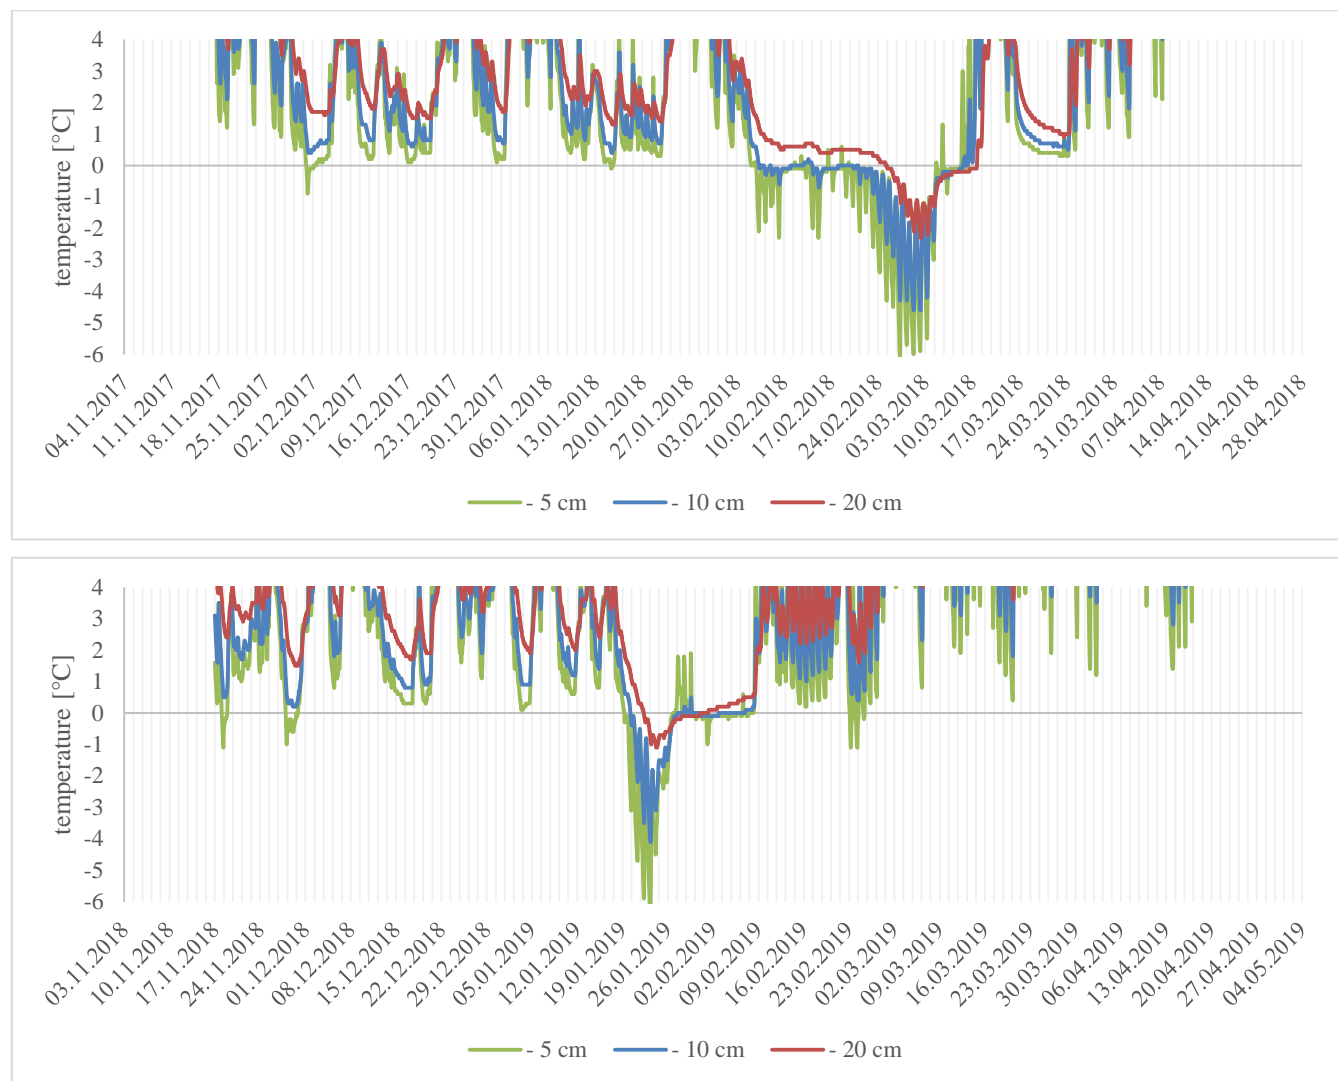

**Figure S1: Hourly temperature profile from three different depths below the soil surface, Bad Lauchstaedt/Germany, winter 2017/2018 (top) and winter 2018/2019 (bottom), silty loam**

## 10 Temperature in Giessen, Germany

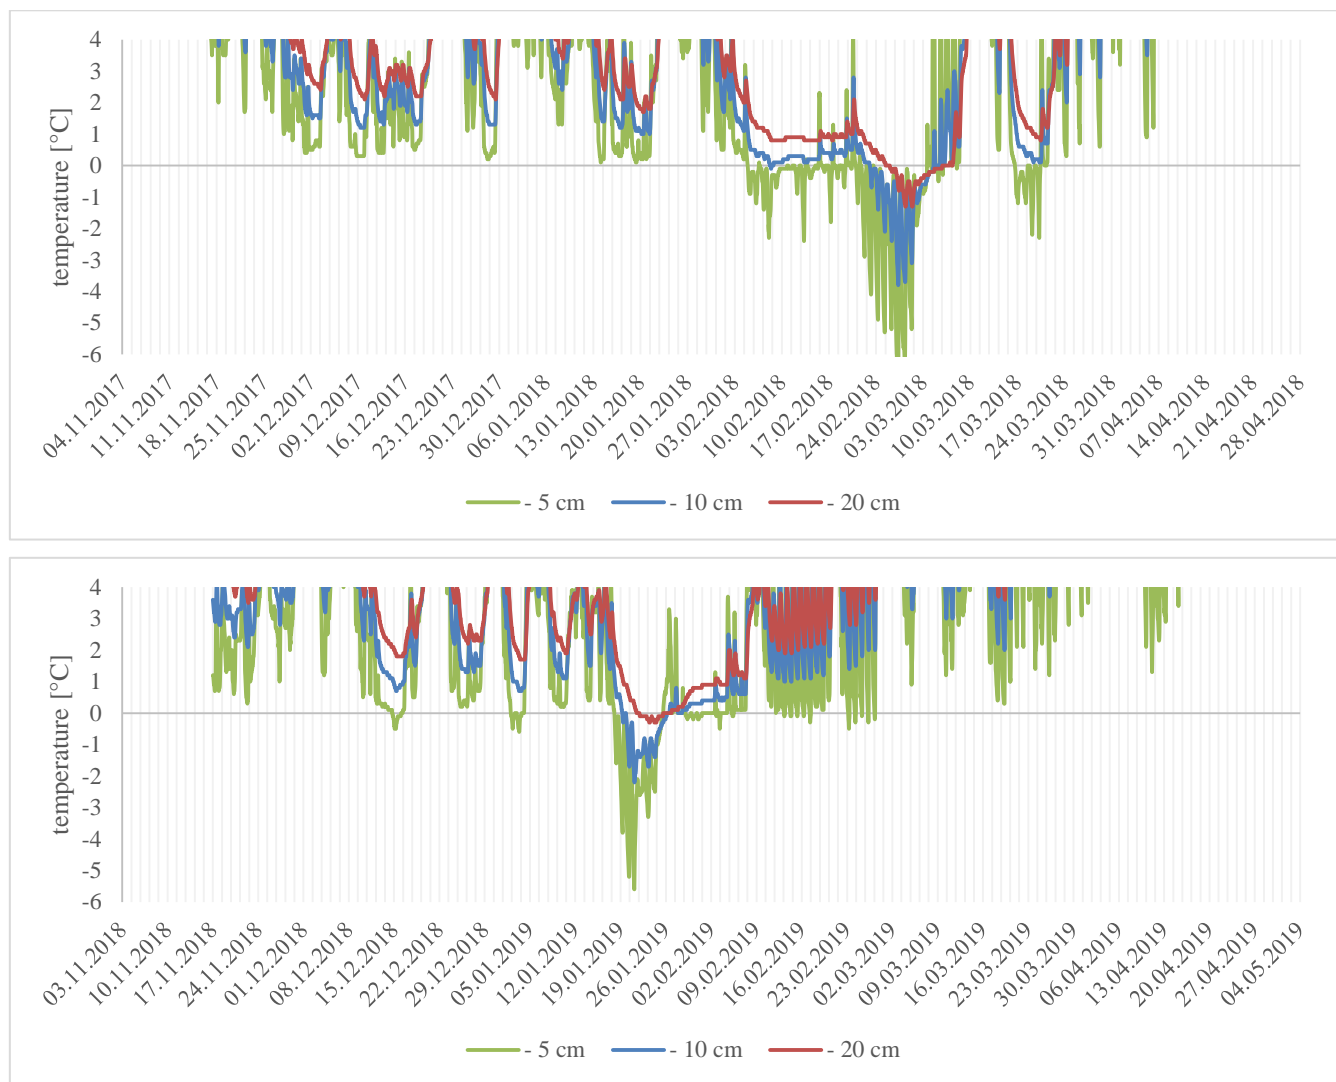

**Figure S2: Hourly temperature profile from three different depths below the soil surface, Giessen/Germany, winter 2017/2018 (top) and winter 2018/2019 (bottom), silty clay**

15

Hourly temperature information in soils at -5 cm, -10 cm and -20 cm depth from both study sites were provided as open source data from the Deutscher Wetterdienst, a higher federal authority under the Federal Ministry of Transport and Digital Infrastructure (webpage: [https://www.dwd.de/EN/climate\\_environment/cdc/cdc.html](https://www.dwd.de/EN/climate_environment/cdc/cdc.html), last access January 21, 2021).

20

**S3: X-ray  $\mu$ CT section of an undisturbed loamy sand soil sample taken under grassland**

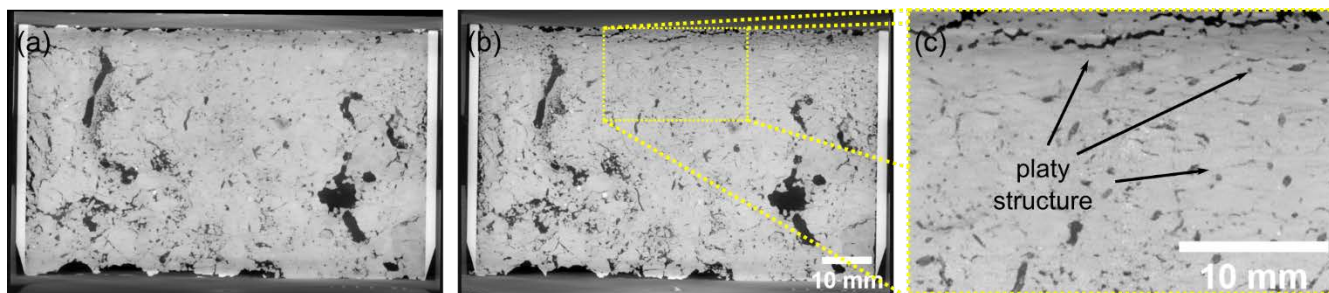

25 **Figure S3: Vertical section of an undisturbed loamy sand sample after 0 (a) and 19 FTCs (b). The enlarged detail (c) shows the section close to the soil surface where a platy soil structure has been created by multiple FTC.**
